# Supplementary material for: Poly-ADP-ribosylation-mediated degradation of ARTD1 by the NLRP3 inflammasome is a prerequisite for osteoclast maturation
Source: PubMed Central journal article supplement (PMC4823959; doi:10.1038/cddis.2016.58), 2016-03-24
Supplement: cddis201658x1.pdf [file cddis201658x1.pdf]

Figure S1

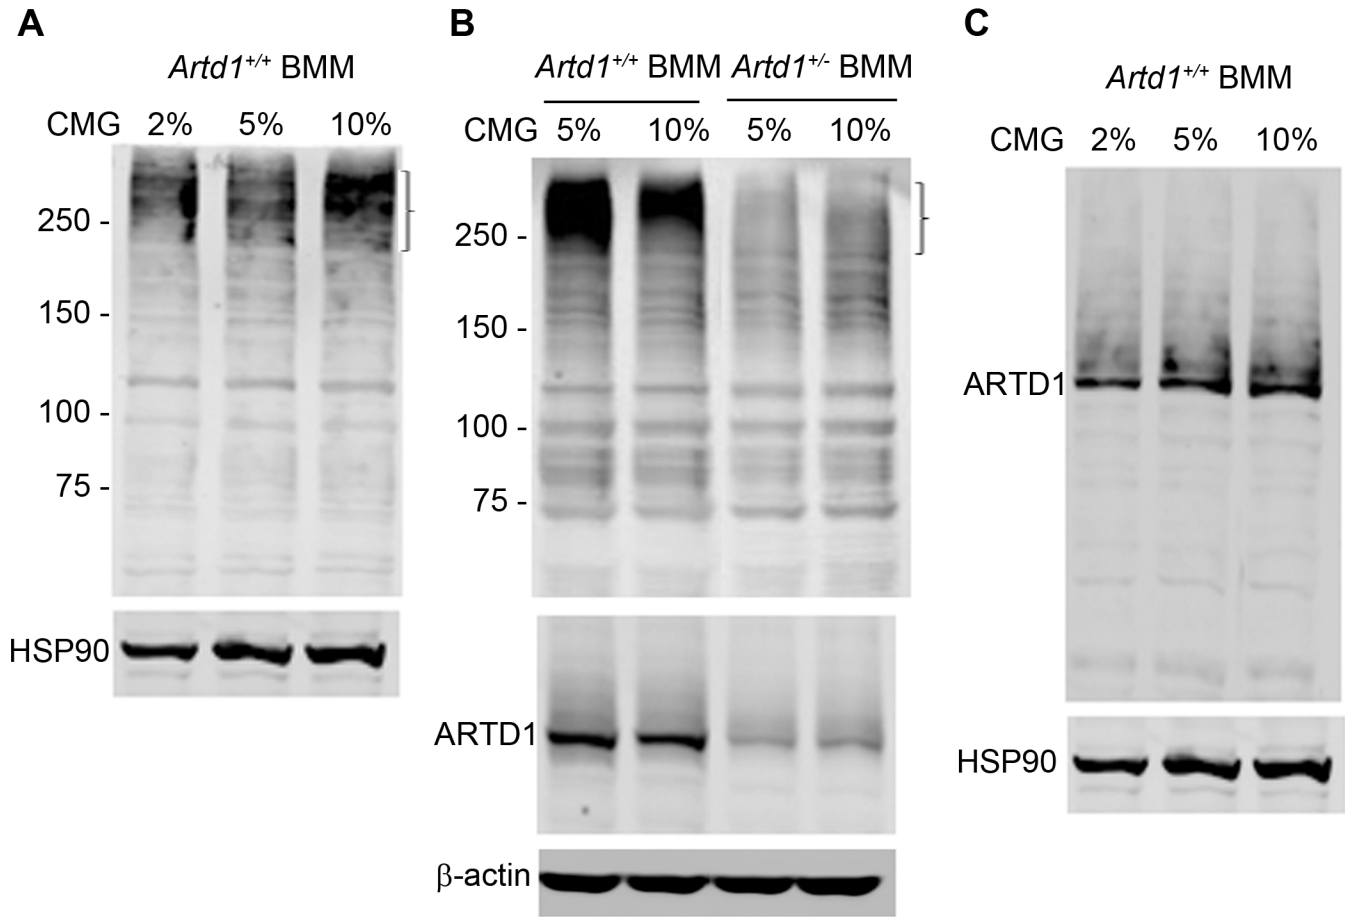

Figure S2

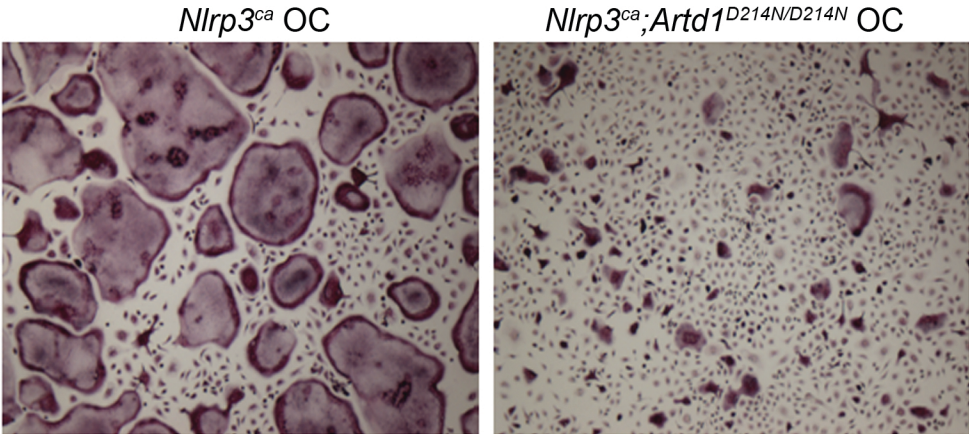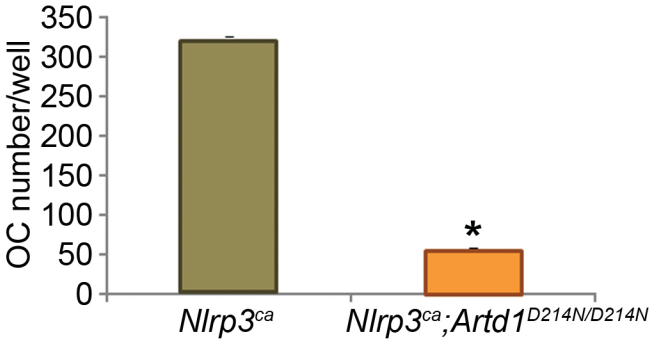

Figure S3

**A**

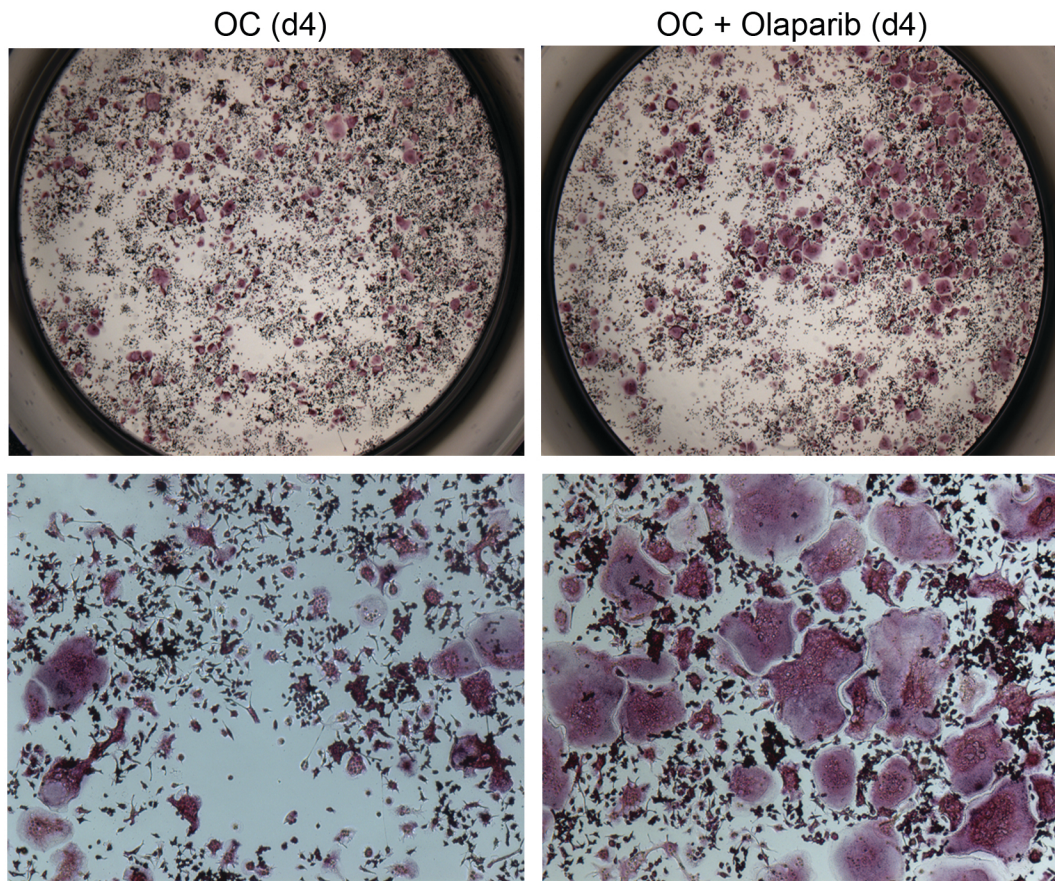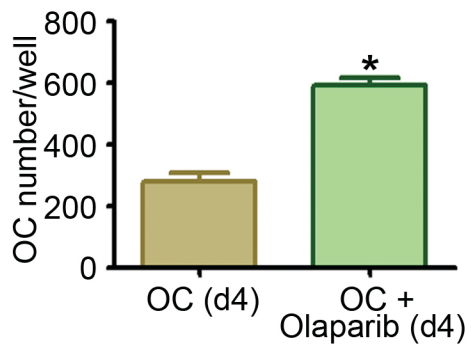

**B**

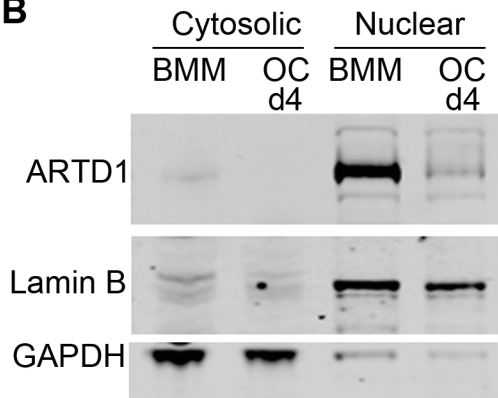

**C**

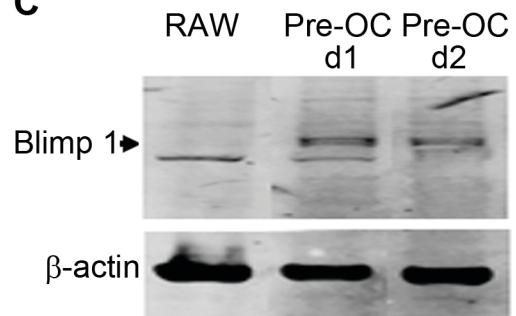

Figure S4

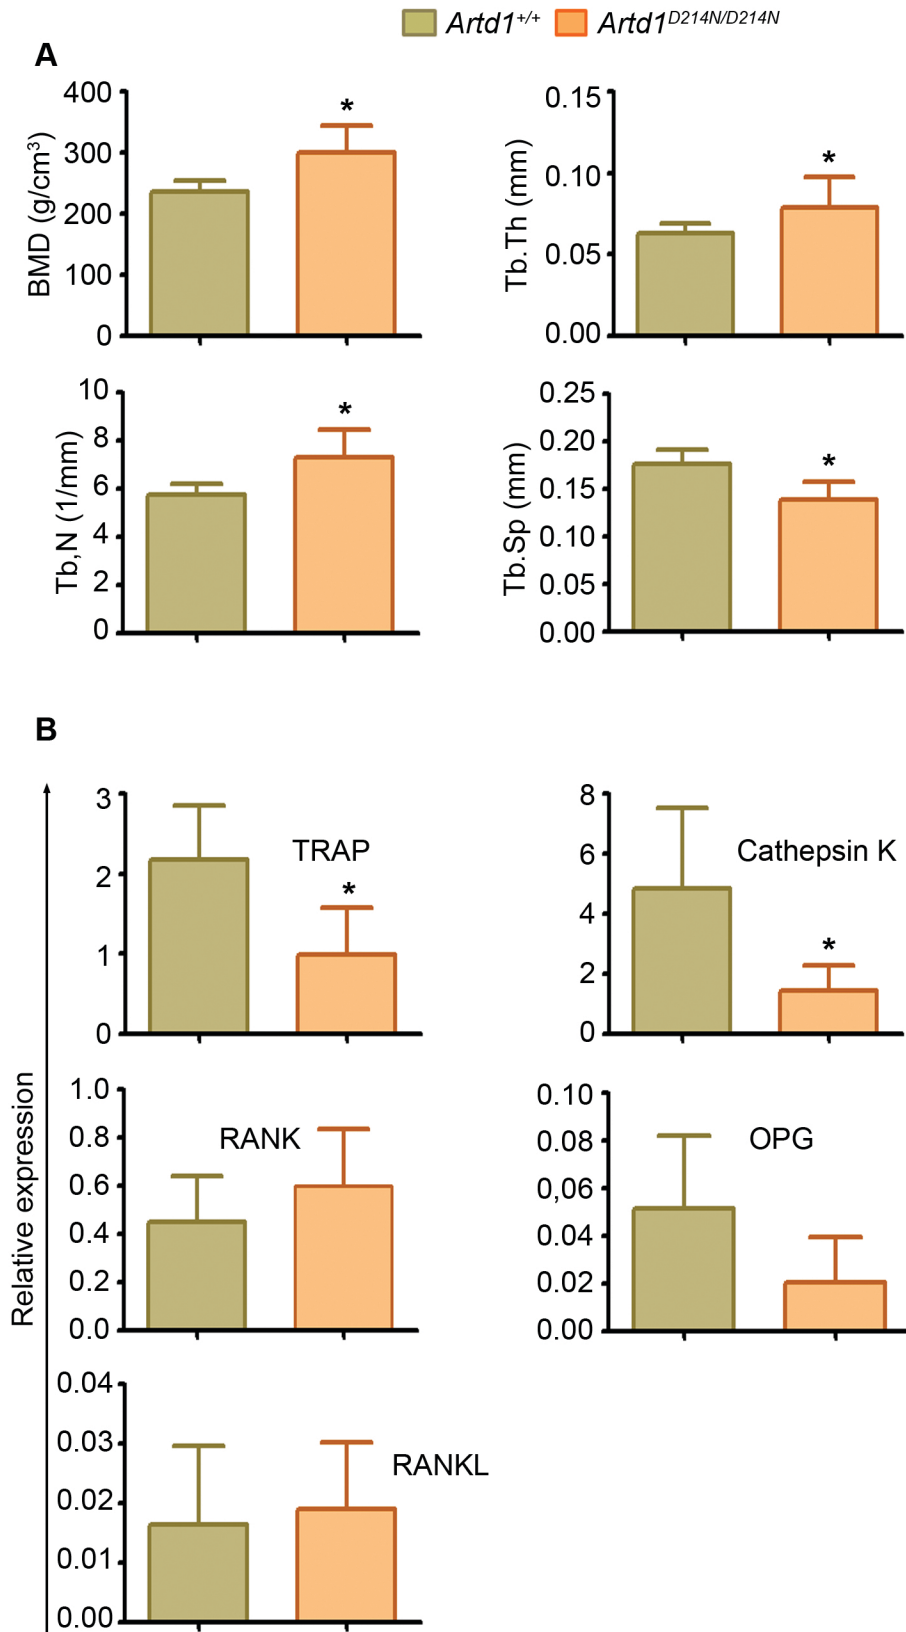



Figure S5

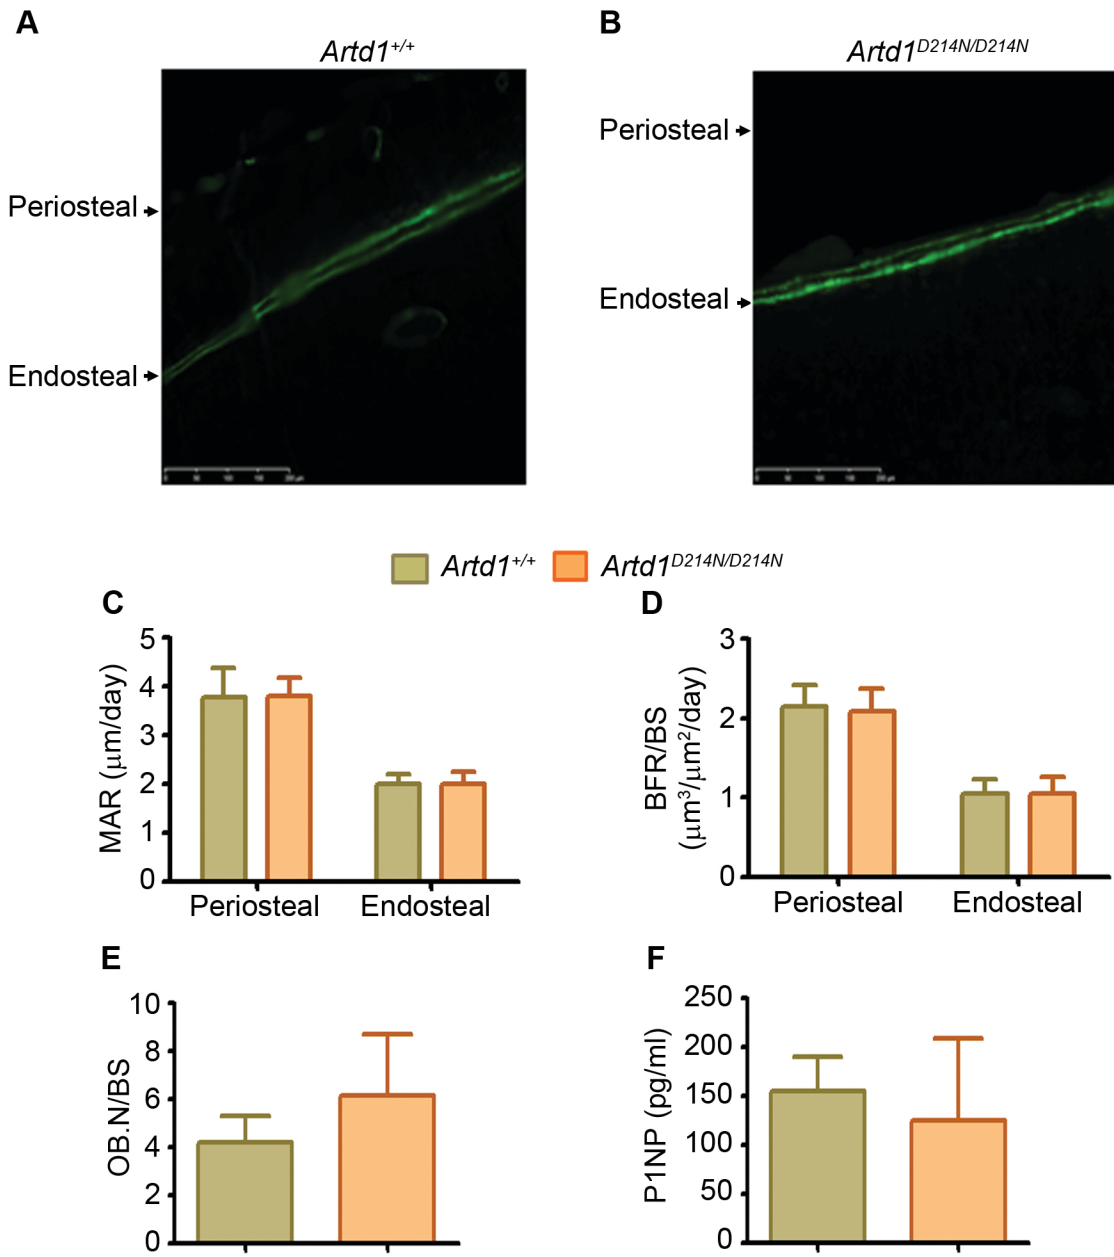

### Supplemental Information

**Figure S1.** CMG-containing M-CSF induces protein PARylation in ARTD1-dependent manner. *Artd1*<sup>+/+</sup> or *Artd1*<sup>+/-</sup> BMM were treated with CMG, and samples were subjected to Western blot analysis using PAR {A, B (top panel)}, ARTD1 {(B, middle panel), C}, HSP90 (A, C) or  $\beta$ -actin (B) antibody. The lanes from the same membranes were cut and pasted (B). Bracket indicates areas of profound changes in PARylation.

**Figure S2.** ARTD1<sup>D214N</sup> inhibits NLRP3<sup>ca</sup>-induced OC formation. *Nlrp3*<sup>ca</sup> or *Artd1*<sup>D214N/D214N</sup>;*Nlrp3*<sup>ca</sup> BMM were treated with 2% CMG and 100 ng/ml RANKL for 4 days. Cultures were stained for TRAP activity, and OC number was counted. \*P < 0.05.

**Figure S3.** ARTD1 expression inversely correlates with OC formation, and its Inhibition promotes this process. (A) RAW 264.7 cells were treated with 100 ng/ml RANKL for 4 days (d, day) in the absence or presence of 1  $\mu$ M olaparib. Representative pictures from each group run in triplicates were taken at 2X (top panels) or 10X (bottom panels), and OC number was counted. \*P < 0.05. (B) BMM were treated with 2% CMG (BMM) or 2% CMG and 100 ng/ml RANKL for 4 days (OC d4). ARTD1 expression was analyzed by immunoblotting. Lamin B and GAPDH were used to monitor the purity of the fractions. (C) RAW 264.7 cells were left untreated (RAW) or treated with 100 ng/ml RANKL for 1 or 2 days, and Blimp1 expression was analyzed by immunoblotting.

**Figure S4.** ARTD1<sup>D214N</sup> causes high bone mass, and inhibits the expression of OC markers. (A)  $\mu$ CT analysis of femoral BV/TV of 2-week-old *Artd1*<sup>+/+</sup> mice (n=8) and *Artd1*<sup>D214N/D214N</sup> mice (n=5). (B) RNA were isolated bone marrow-free bones from 8 week-old *Artd1*<sup>+/+</sup> (n=4) and *Artd1*<sup>D214N/D214N</sup> (n=4) mice, and analyzed by qPCR. Data were normalized to cyclophilin B (relative expression) and expressed as mean  $\pm$  S.D. \*P < 0.05.

**Figure S5.** Bone formation is unaltered in mice expressing ARTD1<sup>D214N</sup>. (A) Fluorescence micrographs of calcein labels on the cortical surfaces of bones from 8-week old male mice. (B) Mineral apposition rate (MAR). (C) Bone formation rate (BFR). (D and E) Histomorphometric analysis of osteoblast surface/bone surface (OB.S/BS) and osteoblast number/bone surface (OB.N/BS), respectively, from H&E stained bone sections. (F) Serum levels of PINP analyzed by ELISA. Quantitative data are from 4 *Artd1*<sup>+/+</sup> mice and 4 *Artd1*<sup>D214N/D214N</sup> mice, and are expressed as mean  $\pm$  S.D.

**Table S1.** List of primers for qPCR and ChIP.

| Primers           | Sequence                              |
|-------------------|---------------------------------------|
| Used for qPCR     |                                       |
| NFATC1 Fwd        | CCCGTCACATTCTGGTCCAT                  |
| NFATC1 Rev        | CAAGTAACCGTGTAGCTGCACAA               |
| Cathepsin K Fwd   | AGGCAGCTAAATGCAGAGGGTACA              |
| Cathepsin K Rev   | AGCTTGCATCGATGGACACAGAGA              |
| Tracp Fwd         | CGTCTCTGCACAGATTGCAT                  |
| Tracp Rev         | AAGCGCAAACGGTAGTAAGG                  |
| Cyclophilin B Fwd | AGCATAACAGGTCTGGCATC                  |
| Cyclophilin B Rev | TTCACCTTCCCAAAGACCAC                  |
| RANK Fwd          | GCATCCCTTGCAGCTCAACA                  |
| RANK Rev          | ATGGAAGAGCTGCAGACCAC                  |
| RANKL Fwd         | TGTACTTTTCGAGCGCAGATG                 |
| RANKL Rev         | AGGCTTGTTTCATCCTCCTG                  |
| PARP1 Fwd         | Biorad Unique Assay ID qMmuCID0005676 |
| PARP1 Rev         | Biorad Unique Assay ID qMmuCID0005676 |
| OPG Fwd           | TCCCGAGGACCACAATGAAC                  |
| OPG Rev           | TGGGTTGTCCATTCAATGATGT                |
| Mitf Fwd          | GTGCAGACCCACCTGGAAAAC                 |
| Mitf Rev          | AGTTAAGAGTGAGCATAGCCATAG              |
| Lhx2 Fwd          | GAAGGGGGCGGCCGAGGAAAC                 |
| Lhx2 Rev          | GCTGGTCACGGTCCAGGTGC                  |
| IRF8 Fwd          | GAGCGAAGTTCCTGAGATGG                  |
| IRF8 Rev          | TGGGCTCCTCTTGGTCCATAC                 |
| MafB Fwd          | GAAGCCCGCGAGGCATAT                    |
| MafB Rev          | GGCCCTGGCACTCACAAA                    |
| Blimp1 Fwd        | GACGGGGGTACTTCTGTTC                   |
| Blimp1 Rev        | GGCATTCTTGGAAGTGTGT                   |
| Id-2 Fwd          | ATATCAGCATCCTGTCCTTGCAG               |
| Id-2 Rev          | GAAATCATGAACACCGCTTATTCAG             |
| 18s Fwd           | CGGCTACCACATCCAGGAA                   |
| 18s Rev           | GCTGGAATTACCGCGGCT                    |
| Used for ChIP     |                                       |
| IRF8 Fwd          | CTGCAACGAAAGTCCCTCTC                  |
| IRF8 Rev          | TTATCGGTTCCCTTGTGTCC                  |
| Lhx2 Fwd          | AGACCCCTACTCCAGTTCCG                  |
| Lhx2 Rev          | GGTTCACCCAGGAACAGCTA                  |
| MafB Fwd          | GCAAGCAAGAAAGCCCTAGA                  |
| MafB Rev          | GGGAACGAGTCAGGTCGAG                   |
| Blimp1 Fwd        | GCATGAGAGGCAGGGCAACA                  |
| Blimp1 Rev        | CCTGCTAACTGAATACATTCAG                |
